# Supplementary material for: Early heme oxygenase 1 induction delays tumour initiation and enhances DNA damage repair in liver macrophages of Mdr2−/− mice
Source: PubMed Central journal article supplement (PMC6214975; doi:10.1038/s41598-018-33233-0), 2018-11-02
Supplement: 41598_2018_33233_MOESM1_ESM.pdf [file 41598_2018_33233_MOESM1_ESM.pdf]

## Early heme oxygenase 1 induction delays tumor initiation and enhances DNA damage repair in liver macrophages of *Mdr2*<sup>-/-</sup> mice

Roja Barikbin, Laura Berkhout, Julia Bolik, Dirk Schmidt-Arras, Thomas Ernst, Harald Ittrich, Gerhard Adam, Ann Parplys, Christian Casar, Till Krech, Khalil Karimi, Gabriele Sass, Gisa Tiegs

### Supplementary Images

#### A Experimental layout

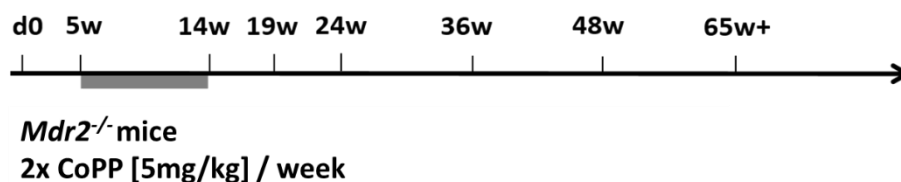

#### B Gating strategy for flow cytometric analysis of T cell subsets

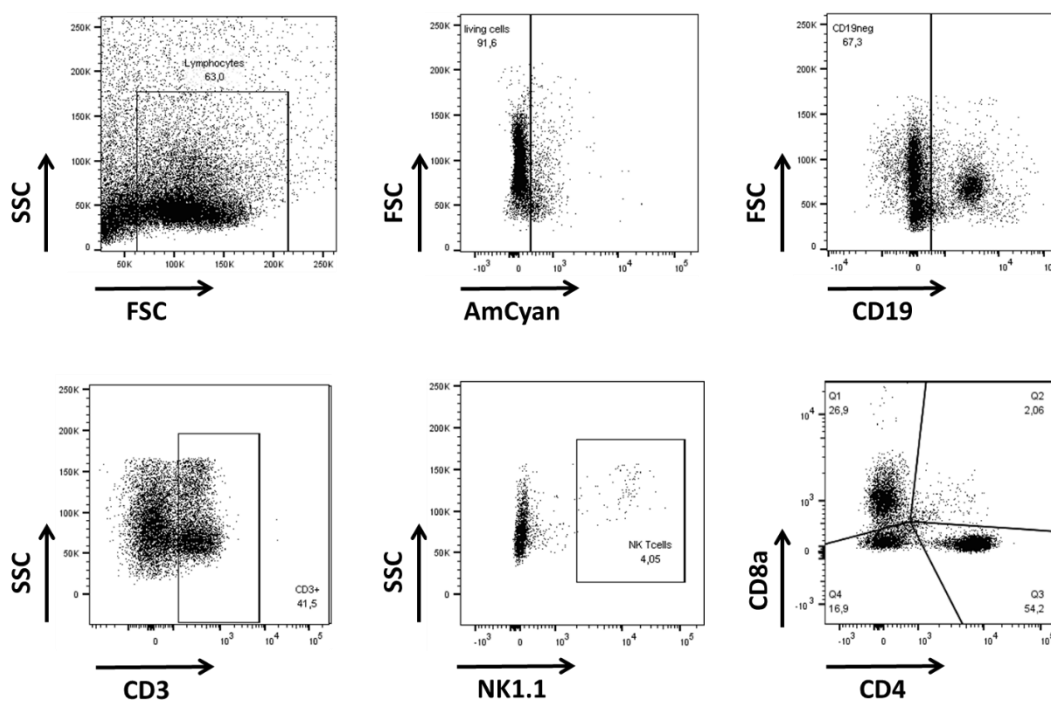

#### C Gating strategy for flow cytometric analysis of phagocytic activity

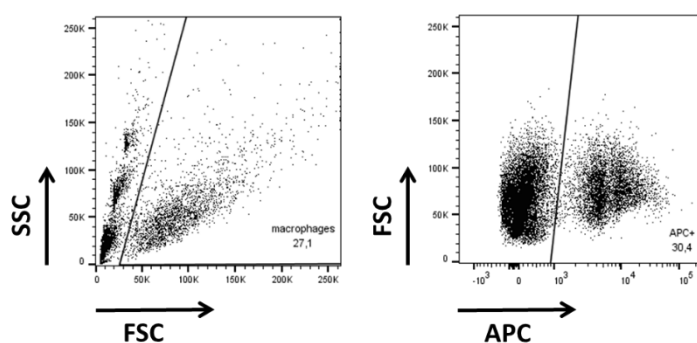

**Supplementary Figure 1:** (A) Experimental layout: *Mdr2*<sup>-/-</sup> mice were treated with HO-1 inducer CoPP [5 mg/kg] twice a week for nine consecutive weeks (week 5-14). At week 14, 24, 36, 48 or 65+

mice were sacrificed for analysis. (B) Gating strategy for T cell subsets: Forward / sideward scatter and AmCyan staining determined vital total leucocytes. CD19<sup>-</sup> and CD3<sup>+</sup> cells were further analysed for NK1.1<sup>+</sup> NKT cells, CD4<sup>+</sup> T cells, and CD8<sup>+</sup> T cells. (C) Gating strategy for the phagocytosis assay of bone marrow derived macrophages with APC<sup>+</sup> BD Calibrite bead (BD Pharmingen, San Jose, CA): Macrophages were identified via forward / sideward scatter. Phagocytic macrophages were identified via APC fluorescence of engulfed beads.

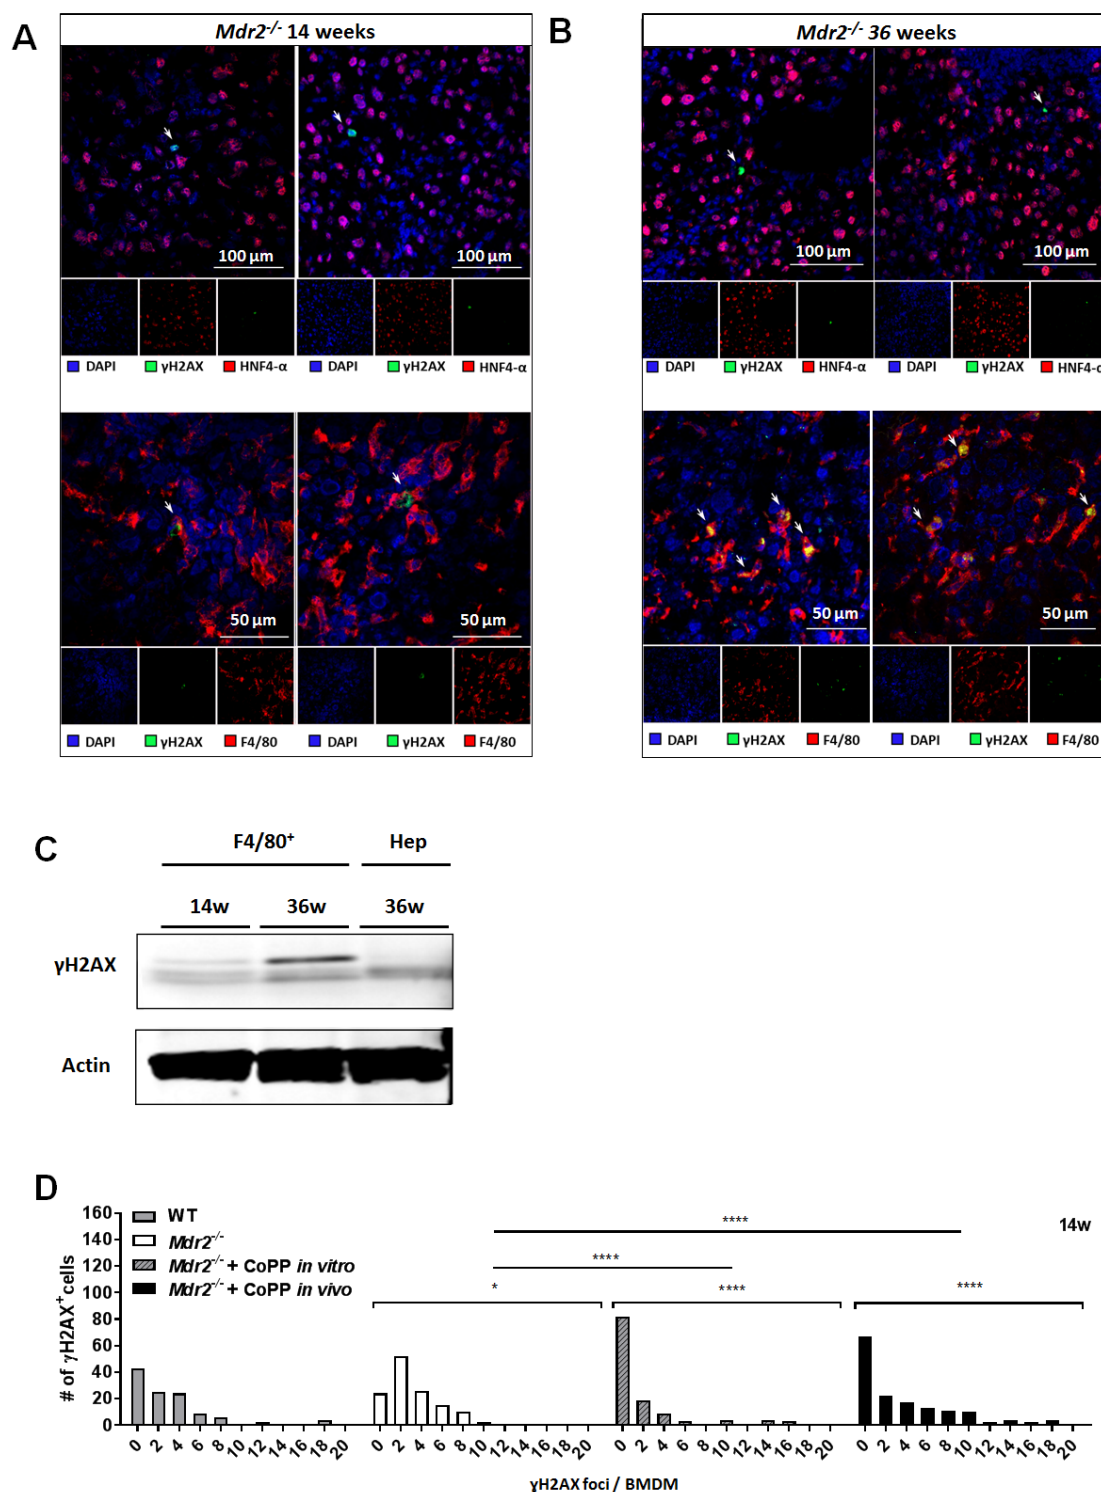

**Supplementary Figure 2:** (A) Representative images (20x) of tissue sections of 14- and (B) 36-week-old *Mdr2*<sup>-/-</sup> mice stained for DAPI, γH2AX, and the hepatocyte marker HNF4-α (upper panel) as well as DAPI, γH2AX, and the macrophage marker F4/80 (lower panel). (C) Protein levels of γH2AX in F4/80<sup>+</sup> macrophages and hepatocytes isolated from in 14- and 36-week old *Mdr2*<sup>-/-</sup> mice. The full length western blot is presented in Suppl. Figure 4B. (D) Frequency distribution of γH2AX<sup>+</sup> foci in BMDMs (14-weeks-old; WT, *Mdr2*<sup>-/-</sup>) with or without CoPP treatment *in vitro* [10μg/ml; 24h] or *in vivo* as described in Suppl. Figure 1A.

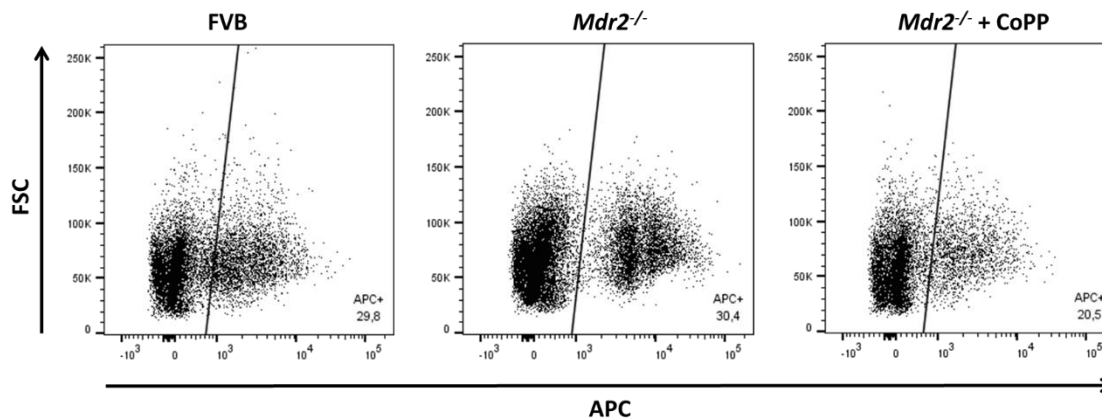

**Supplementary Figure 3:** Representative dot plots of the phagocytosis assay presented in Figure 4G. Bone marrow derived macrophages of FVB (n = 3) and *Mdr2*<sup>-/-</sup> mice treated with PBS (n = 3) or 10  $\mu$ g/ml CoPP (n = 3) for 24 h prior to incubation with APC<sup>+</sup> BD Calibrite bead (BD Pharmingen, San Jose, CA) for 4 h at 37 °C.



(Seehorse, not shown). (Lane 5-17: not shown), Lane 18: Molecular marker (MagicMark XP Western Protein Standard; moved to the left).
